# Supplementary material for: Mechanism of outer membrane destabilization by global reduction of protein content
Source: PubMed Central journal article supplement (PMC10504340; doi:10.1038/s41467-023-40396-6), 2023-09-15
Supplement: 41467_2023_40396_MOESM1_ESM.pdf [file 41467_2023_40396_MOESM1_ESM.pdf]

## Supplemental Figures

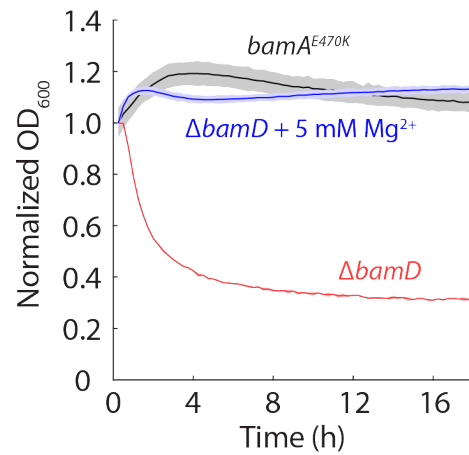

**Figure S1: Mg<sup>2+</sup> addition prevents lysis of  $\Delta bamD$  cells in spent LB.** OD was measured after log-phase cells in LB were transferred to spent LB. OD measurements were normalized to the value upon transfer at  $t=0$ . Curves are mean values and shading represents 1 standard deviation.  $n=2$  biological replicates.

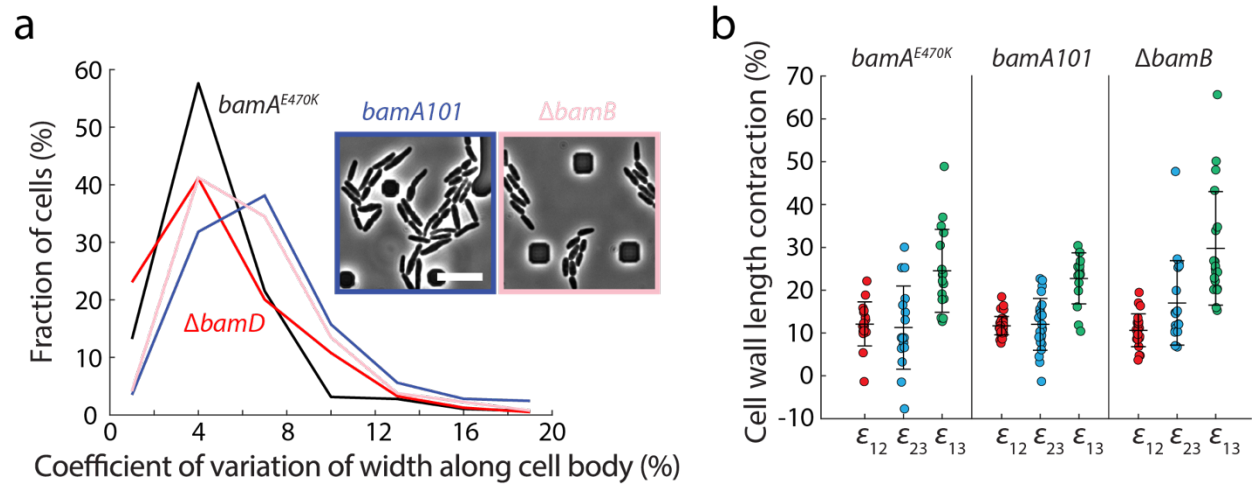

**Figure S2: Introduction of the *bamA101* allele or deletion of *bamB* causes cell shape defects without compromising OM stiffness.**

- a) Similar to  $\Delta bamD$  cells, *bamA101* and  $\Delta bamB$  cells exhibit more width defects than *bamA<sup>E470K</sup>*, as indicated by the increased fraction of cells with larger coefficient of variation of cell width. Cells were grown in a microfluidic device; square regions are pillars in the device. Scale bar: 10  $\mu\text{m}$ .  $n > 260$  cells for each strain.
- b) *bamA101* and  $\Delta bamB$  cells have similar OM stiffness to *bamA<sup>E470K</sup>* cells, as indicated by the similar length contractions ( $\epsilon_{12}$ ,  $\epsilon_{23}$ , and  $\epsilon_{13}$ ) upon plasmolysis, lysis, and in total, respectively. Data are presented as mean values  $\pm 1$  standard deviation. Sample sizes:  $n=17$  cells for  $\epsilon_{12}$ ,  $\epsilon_{23}$ , and  $\epsilon_{13}$  for *bamA<sup>E470K</sup>*;  $n=39$ , 15, and 24 for  $\epsilon_{12}$ ,  $\epsilon_{23}$ , and  $\epsilon_{13}$ , respectively, for *bamA101*;  $n=23$ , 19, and 19 for  $\epsilon_{12}$ ,  $\epsilon_{23}$ , and  $\epsilon_{13}$ , respectively, for  $\Delta bamB$ .

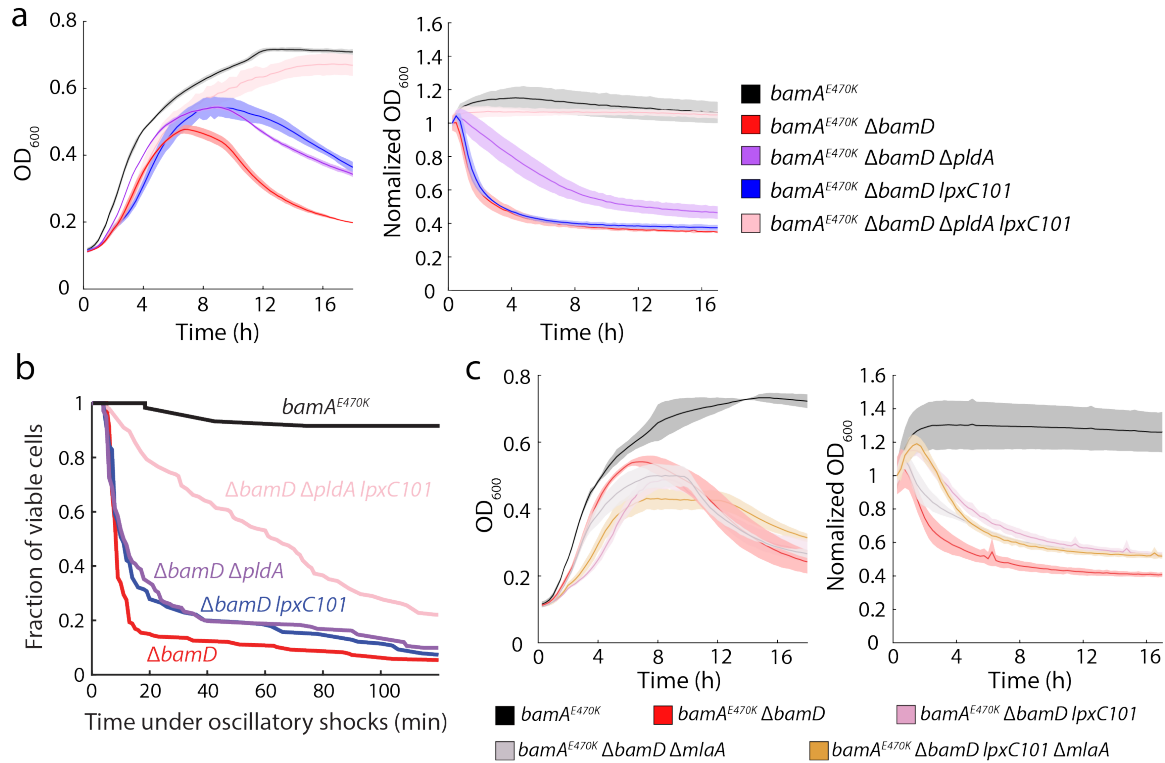

**Figure S3: Introduction of the *lpxC101* allele to Δ*bamD* cells improves cell growth and rescues lysis in spent media similar to deletion of *mlaA*.**

- a) Lysis of Δ*bamD* cells in stationary phase (left) and spent LB (right) was rescued by introduction of the *lpxC101* allele and deletion of *pldA*, while *lpxC101* alone did not suppress lysis in spent LB. *n*=3 biological replicates. Curves are mean values, and shading represents 1 standard deviation.
- b) Cell lysis due to oscillatory hyperosmotic shocks (cycles of 1 min in LB and 1 min in LB+400 mM sorbitol) (Methods) was partially rescued by the *lpxC101* allele and deletion of *pldA*, while *lpxC101* alone did not suppress lysis. *n*=60 for *bamA*<sup>E470K</sup>; *n*>100 cells for all other strains.

c) Lysis of  $\Delta bamD$  cells in stationary phase (left) or spent LB (right) was not suppressed by the *lpxC101* allele, deletion of *mlaA*, or both.  $n=3$  biological replicates and shading represents 1 standard deviation.

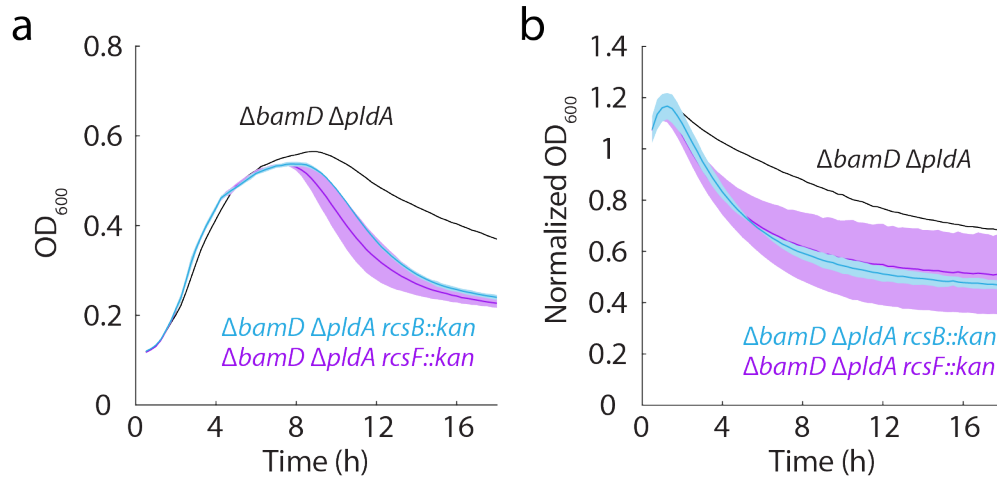

**Figure S4: Disruption of the Rcs pathway does not reduce cell lysis due to *bamD* deletion.**

a,b) Disruption of the Rcs pathway by deleting either *rcsB* or *rcsF* from  $\Delta bamD \Delta pldA$  cells did not reduce cell lysis in stationary phase cultures (a) or in log-phase cultures transferred to spent LB (b). Shading represents 1 standard deviation.  $n=2$  biological replicates for  $\Delta bamD \Delta pldA rcsB::kan$  and  $\Delta bamD \Delta pldA rcsF::kan$ ;  $n = 1$  biological replicate for  $\Delta bamD \Delta pldA$ .

## Supplementary Table

| Strain  | Genotype                                                                        | Source/reference   |
|---------|---------------------------------------------------------------------------------|--------------------|
| MC4100  | F- <i>araD139 (argF-lac)</i> U169 <i>rpsL150 relA1 flb5301 deoC1 ptsF25 thi</i> | Ref. <sup>41</sup> |
| JCM158  | MC4100 <i>ara<sup>R</sup></i>                                                   | Ref. <sup>42</sup> |
| HC687   | MC4100 <i>ara<sup>+</sup> mlaA* ΔyfdI</i>                                       | Ref. <sup>15</sup> |
| IMB1047 | JCM158 <i>bamA<sup>E470K</sup></i>                                              | This study         |
| IMB1056 | JCM158 <i>bamA<sup>E470K</sup> ΔbamD</i>                                        | This study         |
| IMB1132 | JCM158 <i>bamA<sup>E470K</sup> ΔbamD ΔpldA</i>                                  | This study         |
| IMB1089 | JCM158 <i>bamA<sup>E470K</sup> ΔbamD lpxC101 leuB::kan</i>                      | This study         |
| IMB1090 | JCM158 <i>bamA<sup>E470K</sup> ΔbamD lpxC101 leuB::tn10</i>                     | This study         |
| IMB1139 | JCM158 <i>bamA<sup>E470K</sup> ΔbamD ΔpldA lpxC101 leuB::tn10</i>               | This study         |
| IMB1199 | JCM158 <i>bamA<sup>E470K</sup> ΔbamD ΔmlaA lpxC101 leuB::tn10</i>               | This study         |
| IMB1235 | JCM158 <i>bamA<sup>E470K</sup> ΔbamD ΔmlaA</i>                                  | This study         |
| IMB1231 | JCM158 <i>bamA<sup>E470K</sup> ΔbamD ΔpldA ΔmlaA</i>                            | This study         |
| IMB1233 | JCM158 <i>bamA<sup>E470K</sup> ΔbamD ΔpldA ΔmlaC</i>                            | This study         |
| IMB1130 | JCM158 <i>bamA<sup>E470K</sup> lptD-3xFLAG</i>                                  | This study         |
| IMB1131 | JCM158 <i>bamA<sup>E470K</sup> ΔbamD lptD-3xFLAG</i>                            | This study         |
| IMB1241 | JCM158 <i>bamA<sup>E470K</sup> ΔbamD lptD-3xFLAG lpxC101 leuB::kan</i>          | This study         |
| IMB1242 | JCM158 <i>bamA<sup>E470K</sup> ΔbamD lptD-3xFLAG mlaA::kan</i>                  | This study         |

|                 |                                                                                                                                                                         |                    |
|-----------------|-------------------------------------------------------------------------------------------------------------------------------------------------------------------------|--------------------|
| IMB1243         | JCM158 <i>bamA</i> <sup>E470K</sup> $\Delta$ <i>bamD</i> <i>lptD</i> -3xFLAG<br><i>pldA</i> :: <i>kan</i>                                                               | This study         |
| IMB1247         | JCM158 <i>bamA</i> <sup>E470K</sup> $\Delta$ <i>bamD</i> <i>lptD</i> -3xFLAG $\Delta$ <i>pldA</i><br><i>lpxC101</i> <i>leuB</i> :: <i>kan</i>                           | This study         |
| IMB1248         | JCM158 <i>bamA</i> <sup>E470K</sup> $\Delta$ <i>bamD</i> <i>lptD</i> -3xFLAG $\Delta$ <i>pldA</i><br><i>mlaA</i> :: <i>kan</i>                                          | This study         |
| IMB1143         | JCM158 <i>bamA</i> <sup>E470K</sup> <i>attHK</i> :: <i>Plac-mCherry</i><br><i>pZS21kan</i> :: <i>GFP</i>                                                                | This study         |
| IMB1144         | JCM158 <i>bamA</i> <sup>E470K</sup> $\Delta$ <i>bamD</i> <i>attHK</i> :: <i>Plac-mCherry</i><br><i>pZS21kan</i> :: <i>GFP</i>                                           | This study         |
| IMB1210         | JCM158 <i>bamA</i> <sup>E470K</sup> $\Delta$ <i>bamD</i> <i>lpxC101</i> <i>leuB</i> :: <i>tn10</i><br><i>attHK</i> :: <i>Plac-mCherry</i> <i>pZS21kan</i> :: <i>GFP</i> | This study         |
| IMB1211         | JCM158 <i>bamA</i> <sup>E470K</sup> $\Delta$ <i>bamD</i> $\Delta$ <i>pldA</i> <i>attHK</i> :: <i>Plac-</i><br><i>mCherry</i> <i>pZS21kan</i> :: <i>GFP</i>              | This study         |
| IMB1212         | JCM158 <i>bamA</i> <sup>E470K</sup> $\Delta$ <i>bamD</i> <i>lpxC101</i> <i>leuB</i> :: <i>tn10</i><br><i>attHK</i> :: <i>Plac-mCherry</i> <i>pZS21kan</i> :: <i>GFP</i> | This study         |
| IMB1239         | JCM158 <i>bamA</i> <sup>E470K</sup> $\Delta$ <i>bamD</i> $\Delta$ <i>mlaA</i> <i>attHK</i> :: <i>Plac-</i><br><i>mCherry</i> <i>pZS21kan</i> :: <i>GFP</i>              | This study         |
| IMB1240         | JCM158 <i>bamA</i> <sup>E470K</sup> $\Delta$ <i>bamD</i> $\Delta$ <i>pldA</i> $\Delta$ <i>mlaA</i><br><i>attHK</i> :: <i>Plac-mCherry</i> <i>pZS21kan</i> :: <i>GFP</i> | This study         |
| IMB1202         | JCM158 <i>bamA</i> <sup>E470K</sup> $\Delta$ <i>bamD</i> $\Delta$ <i>pldA</i> <i>rcsB</i> :: <i>kan</i>                                                                 | This study         |
| IMB1203         | JCM158 <i>bamA</i> <sup>E470K</sup> $\Delta$ <i>bamD</i> $\Delta$ <i>pldA</i> <i>rcsF</i> :: <i>kan</i>                                                                 | This study         |
| IMB479          | JCM158 <i>bamA101</i>                                                                                                                                                   | This study         |
| BH92            | JCM158 <i>bamB</i> :: <i>kan</i> (Blattner allele)                                                                                                                      | This study         |
| <b>Plasmids</b> |                                                                                                                                                                         |                    |
| pCP20           | Temperature sensitive vector expressing<br>yeast F1p recombinase                                                                                                        | Ref. <sup>43</sup> |
| pZS21           | Low-copy vector with kanamycin resistance                                                                                                                               | Ref. <sup>44</sup> |
| pZS21::GFP      | Vector expressing cytoplasmic GFP                                                                                                                                       | Ref. <sup>45</sup> |

**Supplementary Table 1: *E. coli* strains and plasmids used in this study.**

|                                    | $\Delta bamD$ ,<br>CV:<br>(0,4) | $bamA^{E470K}$ ,<br>CV: (4,8) | $\Delta bamD$ ,<br>CV:<br>(4,8) | $bamA^{E470K}$ ,<br>CV: (8,12) | $\Delta bamD$ ,<br>CV:<br>(8,12) | $bamA^{E470K}$ ,<br>CV:<br>(12,16) | $\Delta bamD$ ,<br>CV:<br>(12,16) | $\Delta bamD$ ,<br>CV:<br>(16,30) |
|------------------------------------|---------------------------------|-------------------------------|---------------------------------|--------------------------------|----------------------------------|------------------------------------|-----------------------------------|-----------------------------------|
| $bamA^{E470K}$ ,<br>CV: (0,4)      | $8.2 \times 10^{-8}$            | 0.040                         |                                 | 0.31                           |                                  | 0.18                               |                                   |                                   |
| $\Delta bamD$ ,<br>CV: (0,4)       |                                 |                               | 0.52                            |                                | 0.061                            |                                    | 0.0068                            | $1.2 \times 10^{-7}$              |
| $bamA^{E470K}$ ,<br>CV: (4,8)      |                                 |                               | $7.4 \times 10^{-7}$            | 0.94                           |                                  | 0.41                               |                                   |                                   |
| $\Delta bamD$ ,<br>CV: (4,8)       |                                 |                               |                                 |                                | 0.0036                           |                                    | 0.027                             | $1.8 \times 10^{-7}$              |
| $bamA^{E470K}$ ,<br>CV: (8,12)     |                                 |                               |                                 |                                | 0.0025                           | 0.56                               |                                   |                                   |
| $\Delta bamD$ ,<br>CV: (8,12)      |                                 |                               |                                 |                                |                                  |                                    | 0.21                              | $1.9 \times 10^{-5}$              |
| $bamA^{E470K}$ ,<br>CV:<br>(12,16) |                                 |                               |                                 |                                |                                  |                                    | 0.64                              |                                   |
| $\Delta bamD$ ,<br>CV:<br>(12,16)  |                                 |                               |                                 |                                |                                  |                                    |                                   | 0.0057                            |

Supplementary Table 2: Pairwise  $p$ -values from two-sample Kolmogorov-Smirnov tests in Figure 2b.
